# Supplementary material for: Dual-responsive and NIR-driven free radical nanoamplifier with glutathione depletion for enhanced tumor-specific photothermal/thermodynamic/chemodynamic synergistic Therapy
Source: Royal Society of Chemistry journal article supplement (doi:10.1039/d2bm01025a), 2022-01-01
Supplement: d2bm01025a1.pdf [file d2bm01025a1.pdf]

## Supporting Information

### **Dual-Responsive and NIR-Driven Free Radical Nanoamplifier with Glutathione Depletion for Enhanced Tumor-Specific Photothermal/Thermodynamic/Chemodynamic Synergistic Therapy**

*Fanghui Chen,<sup>a</sup> Xichen Zhang,<sup>a</sup> Zining Wang,<sup>a</sup> Chensen Xu,<sup>a</sup> Jinzhong Hu,<sup>a</sup> Ling Liu,<sup>\*,c</sup>*

*Jiancheng Zhou,<sup>\*,a</sup> Baiwang Sun,<sup>\*,a,b</sup>*

<sup>a</sup> School of Chemistry and Chemical Engineering, Southeast University, Nanjing  
211189, China

<sup>b</sup> Jiangsu Province Hi-Tech Key Laboratory for Biomedical Research, Southeast  
University, Nanjing 211189, China

<sup>c</sup> Department of Infectious Diseases, Hospital of Integrated Traditional Chinese and  
Western Medicine Affiliated with Nanjing University of Chinese Medicine, Nanjing  
210028, China

\* Corresponding authors, E-mail addresses: [lingliumed@163.com](mailto:lingliumed@163.com) (Ling Liu);  
[jczhou@seu.edu.cn](mailto:jczhou@seu.edu.cn) (Jiancheng Zhou); [chmsunbw@seu.edu.cn](mailto:chmsunbw@seu.edu.cn) (Baiwang Sun)

## Supplementary Methods

**Materials.** 1,3,5-trimethylbenzene (TMB), dopamine hydrochloride, ammonia hydroxide (NH<sub>4</sub>OH, 28-30 wt%), Tris-HCl buffer (pH 8.5), methylene blue (MB), glutathione (GSH), 2,2'-azobis[2-(2-imidazolin-2-yl) propane] dihydrochloride (AIPH), hydrogen peroxide (H<sub>2</sub>O<sub>2</sub>, 30 wt%), and fluorescein isothiocyanate (FITC) were purchased from Aladdin Biochemical Technology Co. Ltd. (Shanghai, China). Pluronic F127, copper (II) chloride (CuCl<sub>2</sub>), tannic acid (TA), hyaluronate (HA), 5,5'-dithiobis (2-nitrobenzoic acid) (DTNB), indocyanine green (ICG), and 2,2'-azino-bis(3-ethylbenzothiazoline-6-sulfonicacid) (ABTS) were acquired from Sigma-Aldrich Trading Co. Ltd. (Shanghai, China). RPMI-1640 medium, DMEM medium, fetal bovine serum (FBS), phosphate-buffered saline (PBS), calcein-AM/propidium iodide (PI) stain kit, 2',7'-dichlorodihydrofluorescein diacetate (DCFH-DA), Annexin V-FITC/PI apoptosis detection kit, 4',6-Diamidino-2-phenylindole (DAPI), Lyso-Tracker Red, GSH assay kit, and 3-(4,5-Dimethylthiazol-2-yl)-2,5-diphenyltetrazolium bromide (MTT) were obtained from Jiangsu KeyGen Biotech. Co. Ltd. (Nanjing, China).

**Calculation of the Photothermal Conversion Efficiency.** In order to evaluate the photothermal conversion efficiency ( $\eta$ ), the MACTH dispersion (100  $\mu\text{g mL}^{-1}$ , 1.0 mL) was irradiated with 808 nm laser (1.0 W  $\text{cm}^{-2}$ ) for 600 s, followed by switching off the laser and naturally cooling to ambient temperature. The photothermal conversion efficiency was calculated by the following equation:

$$\eta = \frac{hS(T_{max} - T_{sur}) - Q_{dis}}{I(1 - 10^{-A_{808}})}$$

Where  $h$  is the heat transfer coefficient,  $S$  is the surface area of the container,  $T_{max}$  is the maximum equilibrium temperature of the sample solution,  $T_{sur}$  is the surrounding temperature,  $Q_{dis}$  is the heat generated by the container and solution under laser irradiation,  $I$  is the laser power, and  $A_{808}$  is the absorbance of the sample solution at 808 nm.

**Cell Culture.** Human breast adenocarcinoma cell line (MDA-MB-231) and human normal liver cell line (LO2) were obtained from the Cell Bank of the Chinese Academy of Science (Shanghai, China). The MDA-MB-231 and LO2 cells were cultured in DMEM and RPMI-1640 medium respectively, containing 10% FBS and 1% penicillin/streptomycin at 37 °C under 5% of CO<sub>2</sub>.

## Supplementary Figures

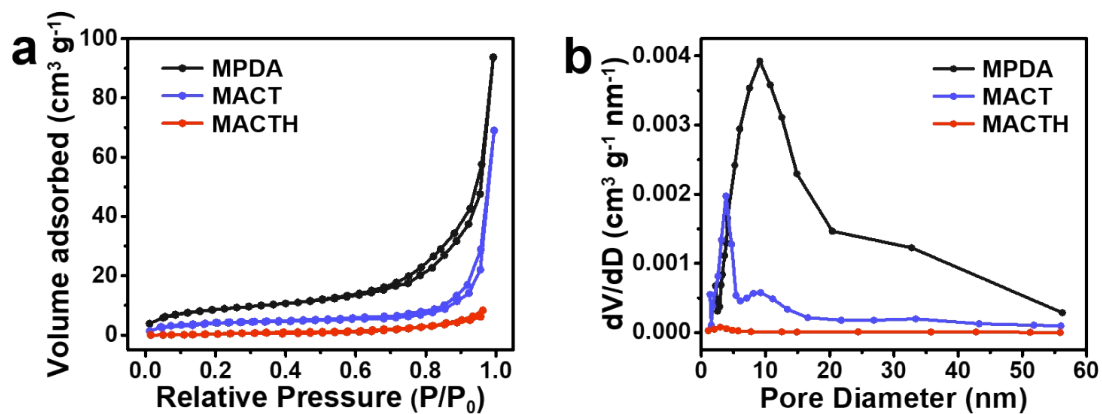

Fig. S1. (a) N<sub>2</sub> adsorption-desorption isotherms and (b) corresponding pore size distribution of MPDA, MACT and MACTH.

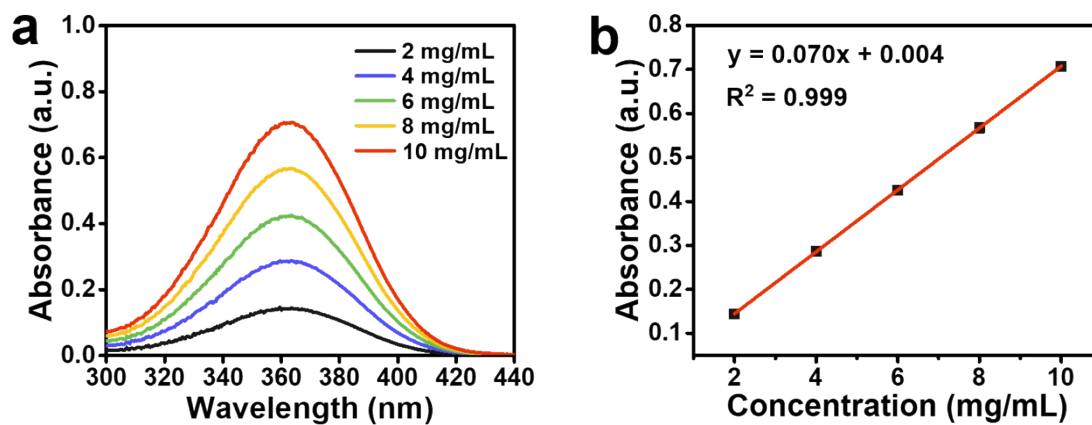

Fig. S2. (a) UV-vis absorption spectra of AIPH at different concentrations. (b) Standard curve of AIPH (absorbance vs. concentration).

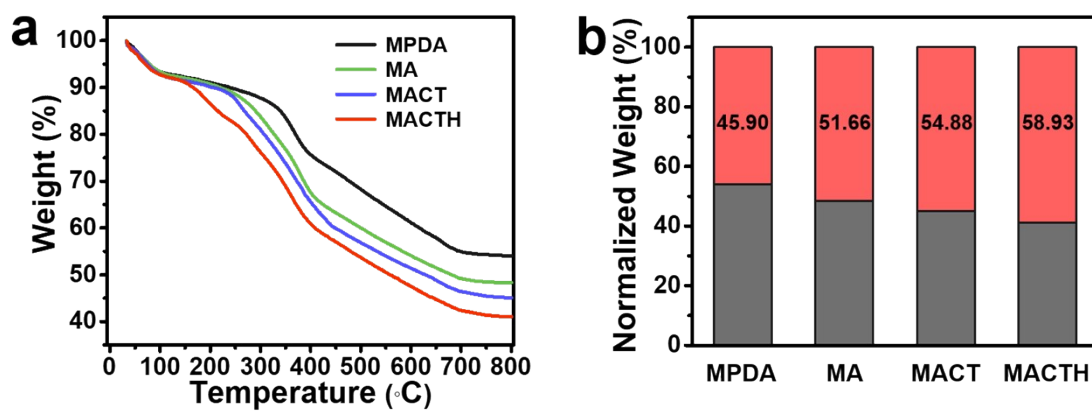

**Fig. S3.** (a) TGA curves and (b) normalized weight loss diagram of MPDA, MA, MACT and MACTH.

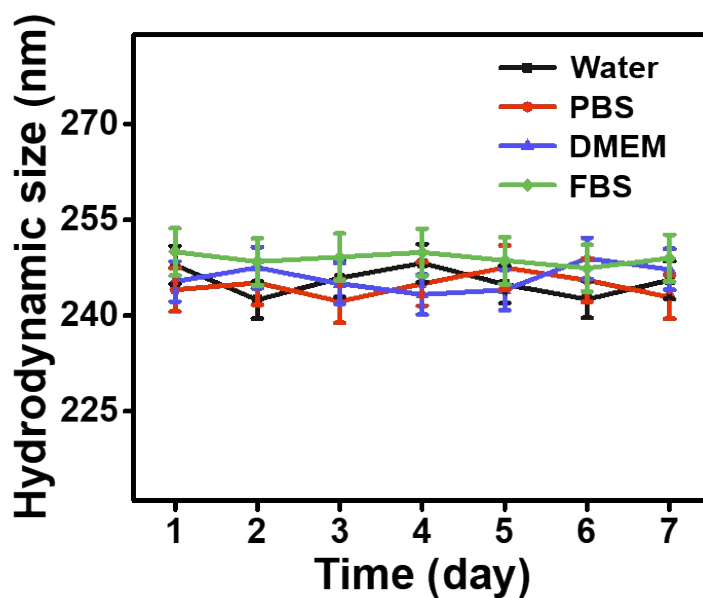

**Fig. S4.** The hydrodynamic size changes of MACTH in various physiological media, including water, PBS, DMEM and FBS for 7 days.

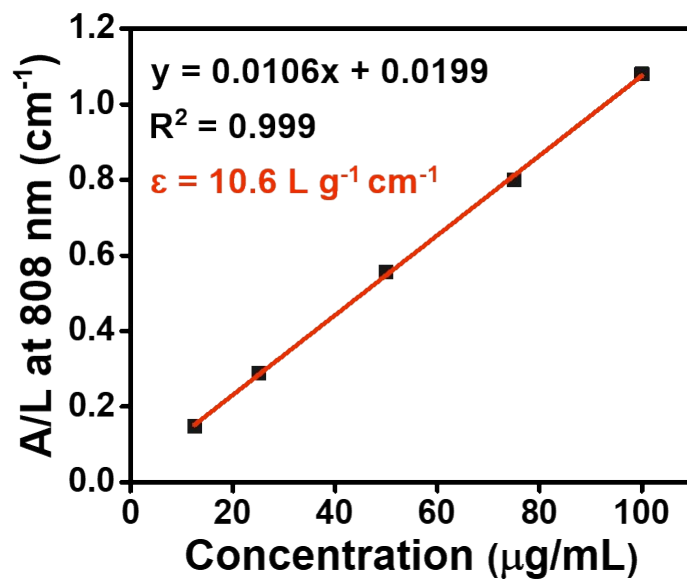

**Fig. S5.** Normalized absorbance of MACTH aqueous solution at 808 nm with different concentrations.

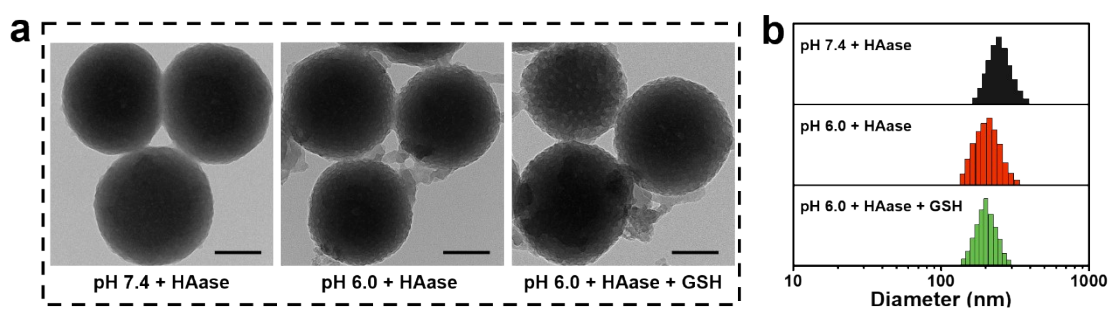

**Fig. S6.** (a) TEM images and (b) hydrodynamic size distributions of MACTH after various treatments for 24 h (scale bars: 100 nm).

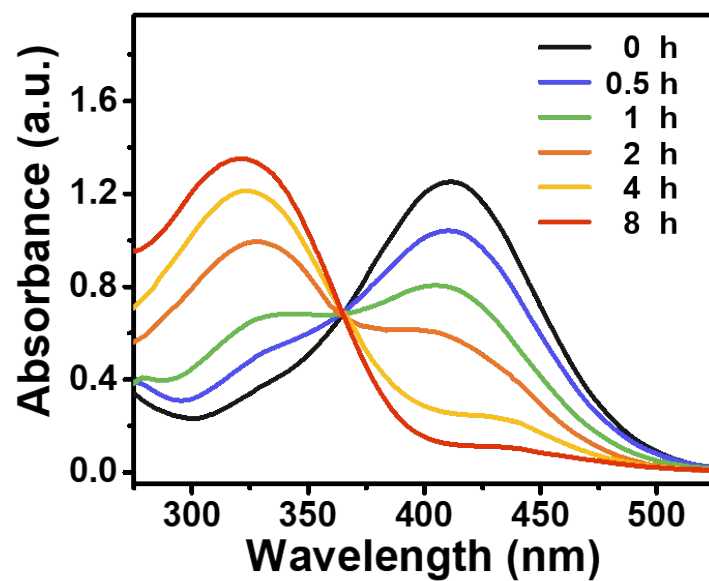

**Fig. S7.** GSH depletion by MACT ( $50 \mu\text{g mL}^{-1}$ ) at different time points.

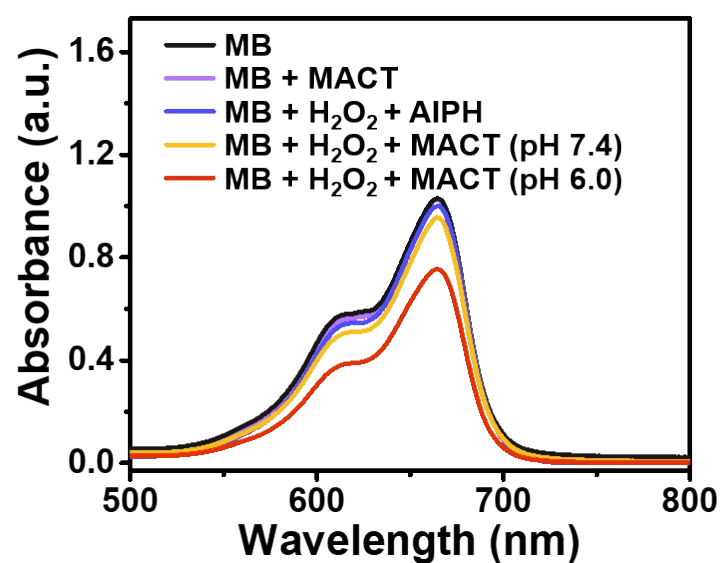

**Fig. S8.** UV-vis absorption spectra of MB after treatment with different samples (AIPH:  $20.3 \mu\text{g mL}^{-1}$ , MACT:  $200 \mu\text{g mL}^{-1}$ ,  $\text{H}_2\text{O}_2$ :  $8 \text{ mM}$ ).

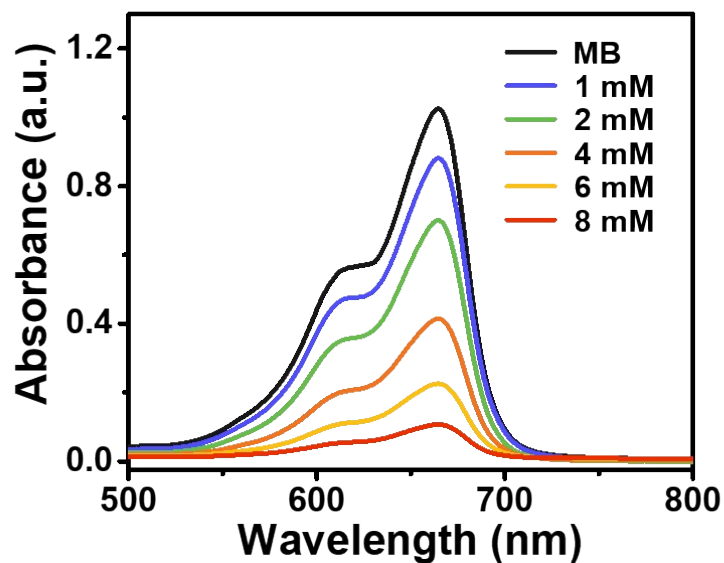

**Fig. S9.** MB degradation by GSH-treated MACT plus different concentrations of  $\text{H}_2\text{O}_2$  at pH 6.0 (MACT:  $200 \mu\text{g mL}^{-1}$ , GSH: 2 mM).

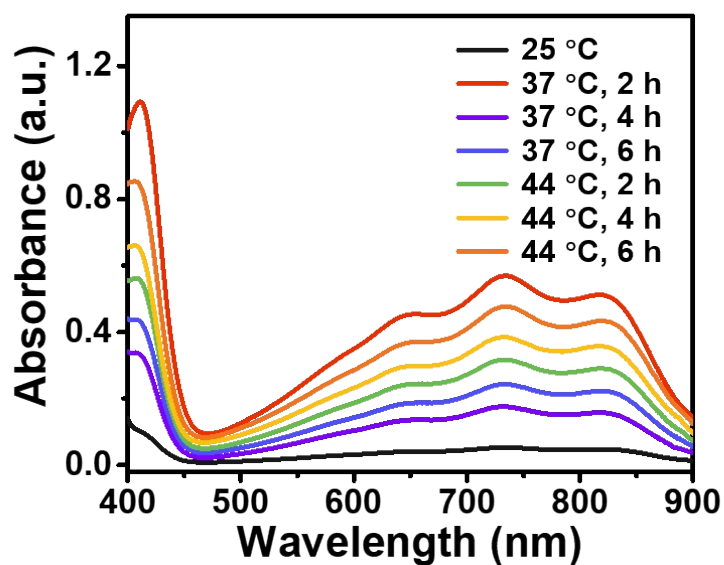

**Fig. S10.** Generation of  $\text{ABTS}^{+\bullet}$  as induced by the free radicals produced from AIPH at different temperatures and time points.



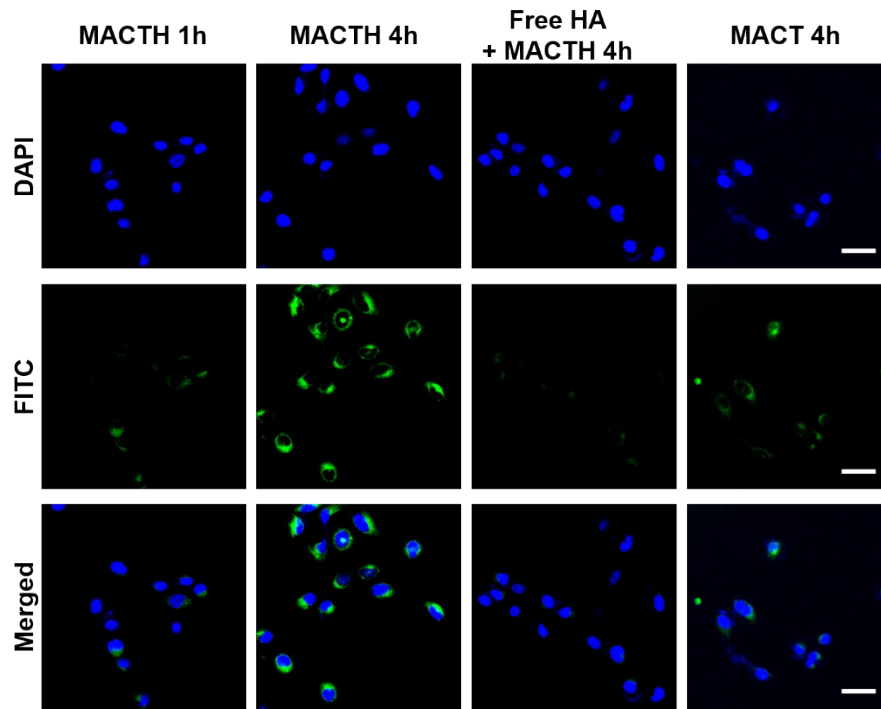

**Fig. S11.** CLSM images of MDA-MB-231 cells treated with FITC-labeled MACT and MACTH (scale bars: 50  $\mu$ m).

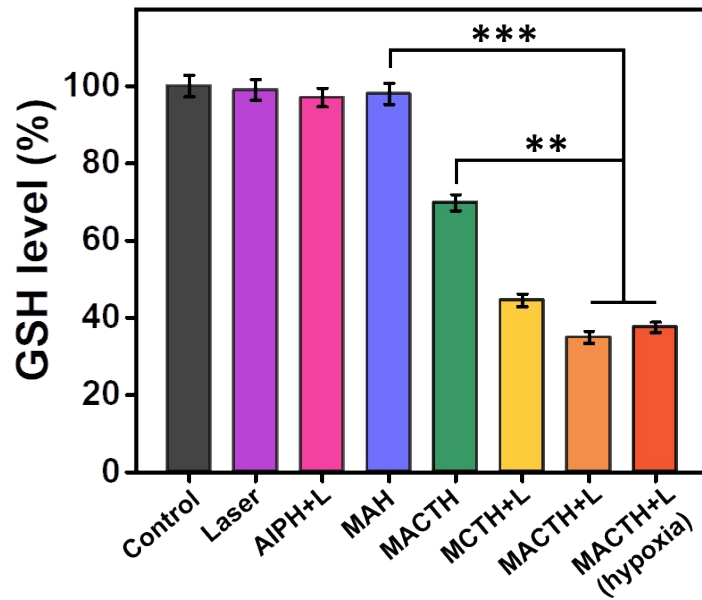

**Fig. S12.** GSH level in MDA-MB-231 cells after different treatments.

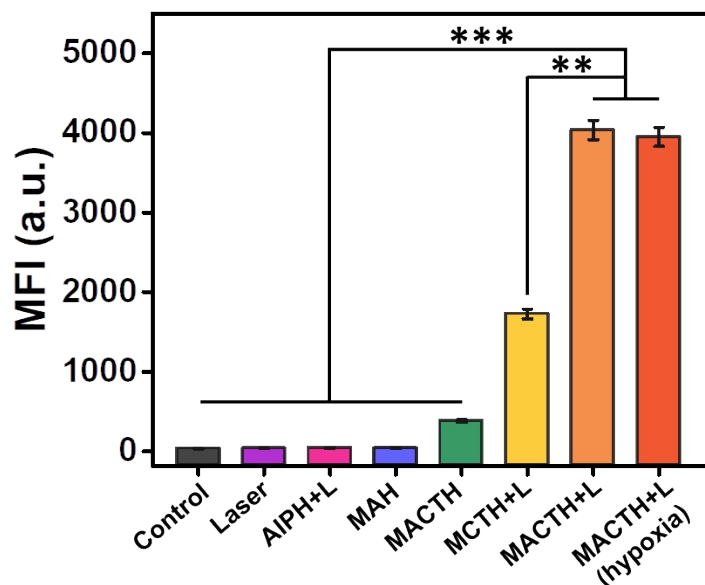

**Fig. S13.** The quantitative mean fluorescence intensity (MFI) of intracellular DCF corresponding to Fig. 4c.

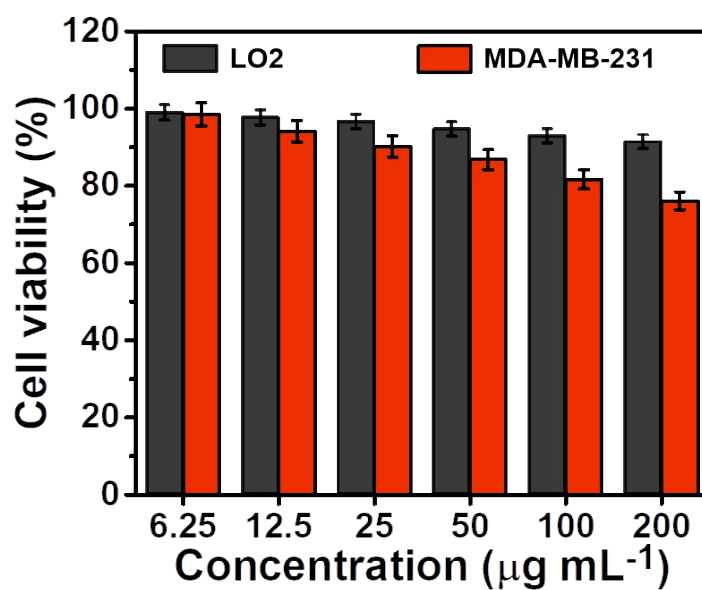

**Fig. S14.** Cell viability of LO2 and MDA-MB-231 cells after treatment with gradient concentrations of MACTH for 24 h.

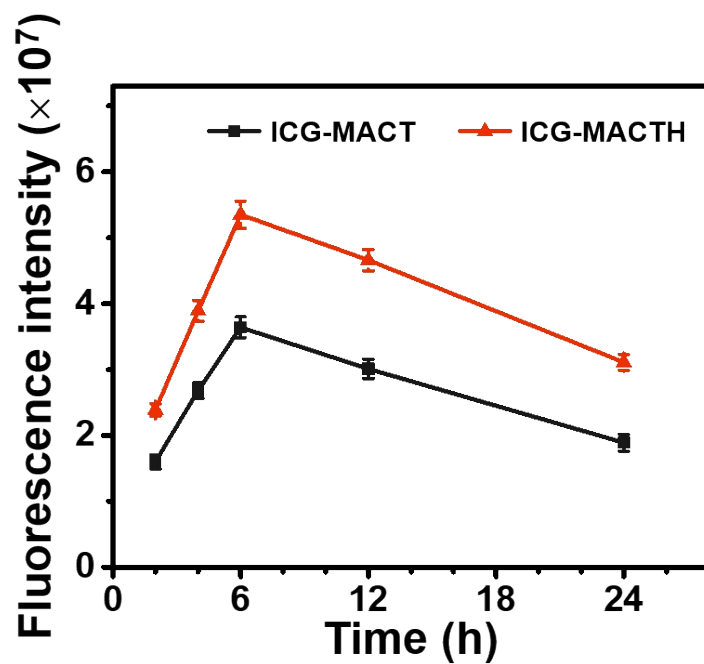

**Fig. S15.** Fluorescence intensity of the tumor sites at different time points corresponding to Fig. 5b.

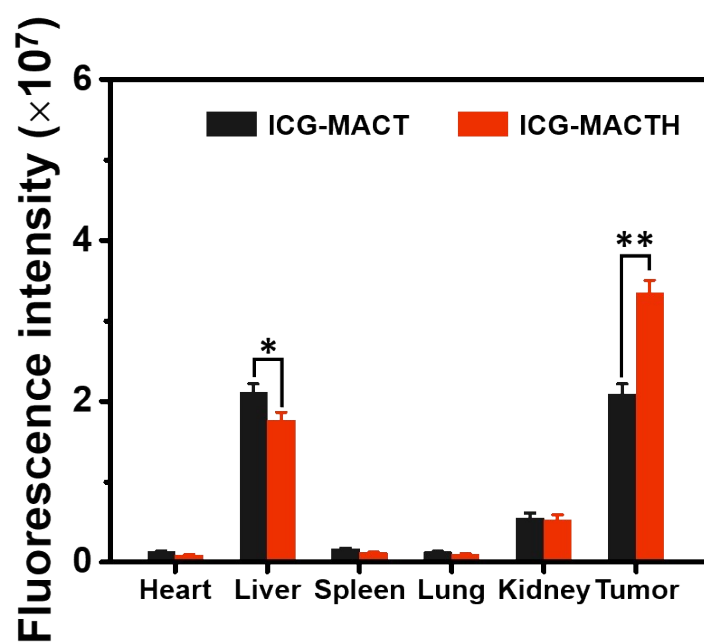

**Fig. S16.** Fluorescence intensity of major organs and tumor corresponding to Fig. 5c.

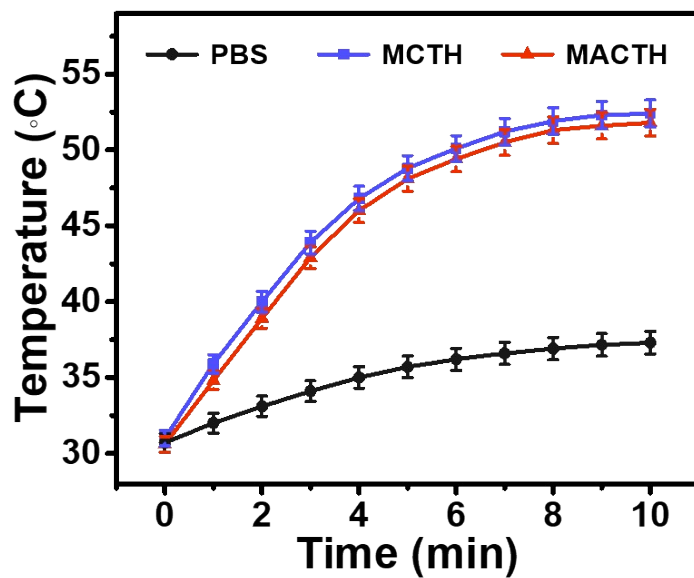

**Fig. S17.** Temperature elevation curves of tumor regions after various treatments corresponding to Fig. 5d.

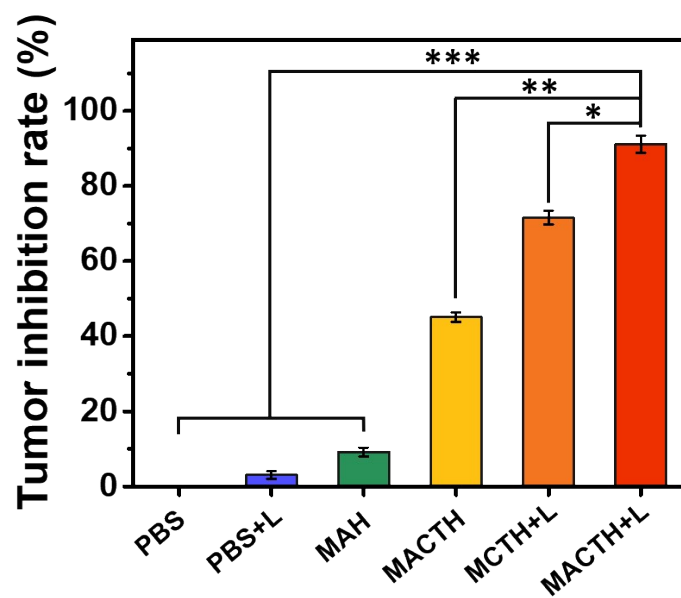

**Fig. S18.** Tumor inhibition rate of MDA-MB-231 tumor-bearing nude mice with various treatments.

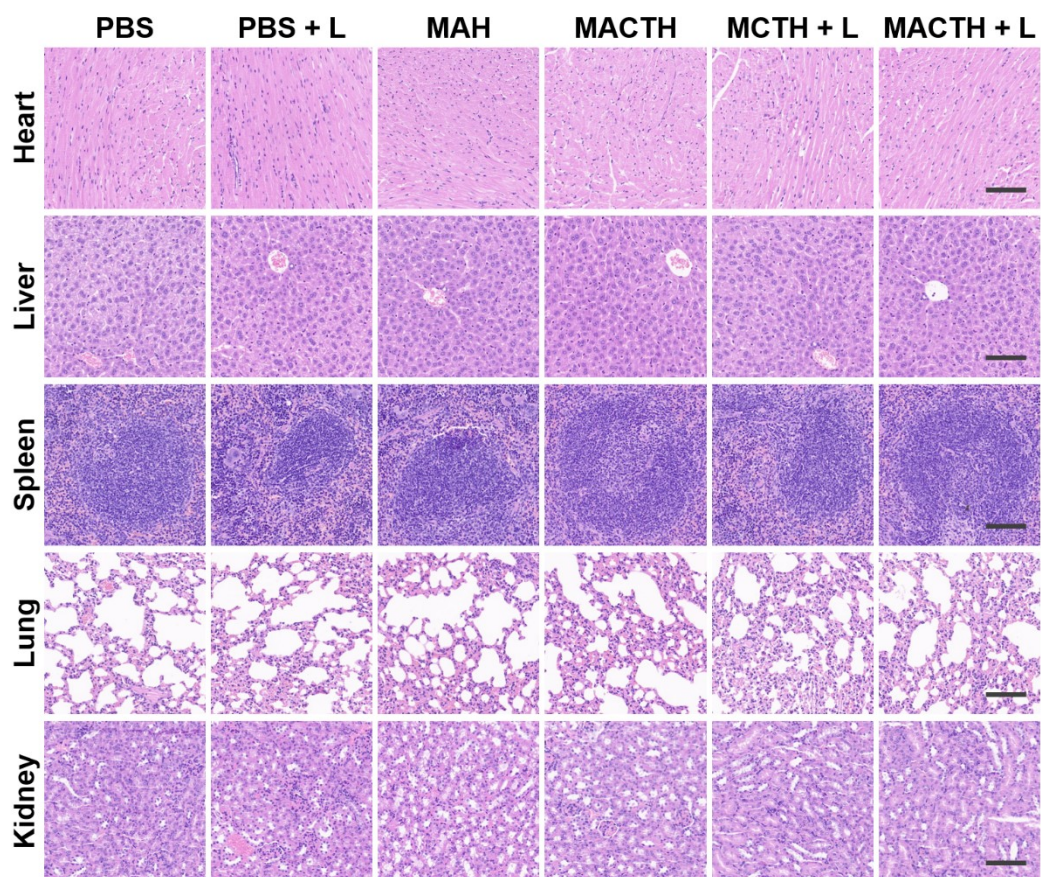

**Fig. S19.** Histopathological examination of the main organs after different treatments

(scale bar: 100  $\mu$ m).
